# Supplementary material
Source: ML conference proceedings conference paper supplement (https://openaccess.thecvf.com/content/ICCV2023/html/Wang_SpaceEvo_Hardware-Friendly_Search_ICCV_2023_paper.html)
Supplement: Supplementary file 1 [file Wang_SpaceEvo_Hardware-Friendly_Search_ICCV_2023_supplemental.pdf]

# Supplementary Material for SpaceEvo

## 1. Experiment

### 1.1. Experiment details

**Supernet Training and QAT.** To train our quantized-for-all supernet, we perform two-stage training: (i) supernet pretraining without quantizers; and (ii) QAT on the pre-trained supernet.

(i) *supernet pretraining without quantizers.* We use the sandwich rule and inplace distillation in BigNAS. Our training hyperparameters setting follows AlphaNet. Specifically, we use SGD with a cosine learning rate decay. We train our supernet for 360 epochs on 8 Tesla Nvidia V100 GPUs. The mini-batch size is 128 per GPU. The initial learning rate is set as 0.1 and is linearly scaled up for every 256 training samples. We use momentum of 0.9, weight decay of  $1e-5$ , dropout of 0.2 after the global average pooling layer. We use AutoAugment [1] for data augmentation and set label smoothing coefficient to 0.1.

(ii) *QAT on the pretrained supernet.* This step starts from a full-precision pretrained supernet. We load checkpoints from step (i) and perform LSQ+ for supernet quantization. The training receipt follows step (i) except we use a smaller learning rate of 0.01 and train the supernet for 50 epochs.

**Quantization-aware NAS baselines.** In our paper, we focus on INT8 quantization because it has been widely supported on real-world devices. Since existing quantization-aware NAS works focus on searching mixed-precision models, we would like not to directly compare our method with mixed-precision NAS works. We select the two state-of-the-art methods of APQ and OQAT and make some modifications based on their original settings.

APQ originally searches the model architecture and its layer-wise mixed-precision of {4, 8} bits. It manages an accuracy predictor that can predict the accuracy of a mixed-precision quantized model. To compare with APQ, we constrain each layer can only search 8bit. For fair comparison, we add our INT8 quantized latency predictor nn-Meter during the model search process. After the search finishes, we follow APQ to perform finetuning of 30 epochs.

OQAT also trains a quantized-for-all supernet. However, it supports 4bit and 2 bit. To compare with OQAT, we simply modify its source code to quantize 8bit and re-do the supernet QAT process. Same with us, the supernet QAT is trained for 50 epochs.

### 1.2. Additional results

**SpaceEvo under larger latency constraints for Intel VNNI.** We provide additional results of search under larger latency constraints of {10, 15, 20, 25, 30}ms. The searched space structure is shown in Table 15. We report the best searched quantized models and compare with SpaceEvo@VNNI in Table 1. Under larger latency constraints, the searched space SpaceEvo@VNNI-large produces better large models ( $\geq 15$  ms).

| Search Space        | Best searched models |      |      |      |      |      |      |
|---------------------|----------------------|------|------|------|------|------|------|
|                     | smallest             | 8ms  | 10ms | 15ms | 20ms | 25ms | 28ms |
| SpaceEvo@VNNI       | 74.7 (4.4ms)         | 76.7 | 77.4 | 78.7 | 79.5 | 80.0 | 80.1 |
| SpaceEvo@VNNI-large | 76.2 (6.7ms)         | 76.5 | 77.1 | 78.9 | 79.7 | 80.1 | 80.3 |

Table 1. SpaceEvo@VNNI-large: searched space under constraint of {10, 15, 20, 25, 30}ms. We report the best searched quantized model accuracy and latency.

| (b) Results on the Google Pixel 6 with TFLite |              |                |             |              |       |
|-----------------------------------------------|--------------|----------------|-------------|--------------|-------|
| Model                                         | Acc%<br>INT8 | Pixel4 Latency |             | Acc%<br>FP32 | FLOPs |
|                                               |              | INT8           | speedup*    |              |       |
| MobileNetV3Small                              | 66.3         | 3.7 ms         | 1.4×        | 67.4         | 56M   |
| OFA-pixel6                                    | 73.9         | 5.1 ms         | 1.9×        | 74.5         | 165M  |
| <b>SEQnet@pixel6-A0</b>                       | <b>74.4</b>  | <b>4.0 ms</b>  | <b>2.2×</b> | 74.5         | 112M  |
| MobileNetV2                                   | 71.4         | 9.5 ms         | 1.9×        | 72.0         | 300M  |
| ProxylessNAS-R                                | 74.6         | 9.9 ms         | 2.0×        | 74.6         | 320M  |
| MobileNetV3Large                              | 74.5         | 8.9 ms         | 1.6×        | 75.2         | 219M  |
| OFA (#25)                                     | 75.6         | 8.0 ms         | 1.9×        | 76.4         | 230M  |
| OFA-pixel6                                    | 76.2         | 10.1 ms        | 2.1×        | 76.7         | 337M  |
| AttentiveNAS-A0                               | 76.1         | 8.7 ms         | 2.2×        | 77.3         | 203M  |
| <b>SEQnet@pixel6-A1</b>                       | <b>77.6</b>  | <b>8.2 ms</b>  | <b>2.4×</b> | 77.7         | 274M  |
| AttentiveNAS-A1                               | 77.2         | 12.1 ms        | 2.2×        | 78.4         | 279M  |
| AttentiveNAS-A2                               | 77.5         | 13.0 ms        | 2.2×        | 78.8         | 317M  |
| <b>SEQnet@pixel6-A2</b>                       | <b>78.3</b>  | <b>11.2 ms</b> | <b>2.5×</b> | 78.4         | 412M  |
| FBNetV2-L1                                    | 75.8         | 14.0 ms        | 1.7×        | 77.2         | 325M  |
| OFA-pixel6                                    | 76.7         | 14.8 ms        | 1.9×        | 77.2         | 403M  |
| FBNetV3-A                                     | 78.2         | 16.2 ms        | 1.7×        | 79.1         | 357M  |
| <b>SEQnet@pixel6-A3</b>                       | <b>78.7</b>  | <b>14.6 ms</b> | <b>2.5×</b> | 78.8         | 533M  |
| EfficientNet-B0                               | 76.7         | 22.2 ms        | 1.7×        | 77.3         | 390M  |
| <b>SEQnet@pixel6-A4</b>                       | <b>79.6</b>  | <b>19.5 ms</b> | <b>2.4×</b> | 79.7         | 676M  |

Table 2. ImageNet results compared with SOTA quantized models on Pixel 6. \*: latency compared to FP32 inference.

**Pixel 6 results.** We provide searched results on a new device. Specifically, we select Google Pixel 6 phone as our test device. We build INT8 quantized latency predictor with nn-Meter for Pixel 6. Table 2 compares the searched quantized models performance with existing state-of-the-art efficient models and best-searched models from OFA MobileNetV3 search space (i.e., OFA-pixel6 in the Table). As we can see from Table 2, our searched space delivers sig-

nificant better INT8 quantized models with higher accuracy and lower latency on Pixel 6 compared to those from OFA MobileNetV3 search space and existing state-of-the-art efficient models. For instance, SpaceEvo@pixel6-A0 runs  $2.2\times$  faster than MobileNetV3-Large with a same-level accuracy. SpaceEvo@pixel6-A4 achieves 79.6% quantized accuracy on ImageNet with only 19.5ms, which is 2.7ms faster than EfficientNet-B0 with 2.9% higher accuracy. The searched quantized models achieve  $\sim 2.4\times$  latency speedup compared to FP32 inference, suggesting a better utilization of on-device INT8 quantization.

## 2. Block-wise quantization

**NSR Loss.** For a sampled model block  $m$  in the  $i^{th}$  stage of a search space, it receives the output of the  $(i - 1)^{th}$  teacher block as the input and is optimized to predict the output of the  $i^{th}$  teacher block with NSR (per-channel noise-to-signal-power ratio) loss:

$$\mathcal{L}(E(m)^i, Y_i) = \frac{1}{C} \sum_{c=0}^C \frac{\|Y_{i,c} - f(Y_{i-1}; E(m)^i)_c\|^2}{\sigma_{i,c}^2} \quad (1)$$

Where  $E(m)^i$  is a sampled block in elastic stage  $E^i$ , it take the  $(i - 1)^{th}$  teacher block’s output feature map  $Y_{i-1}$  as the input.  $Y_i$  is the target output feature map of the  $i^{th}$  block of the teacher model,  $f(Y_{i-1}; E(m)^i)$  maps the output feature map of the sampled block.  $C$  is the number of channels in a feature map and  $\sigma_{i,c}^2$  is the variance of  $Y_{i,c}$ .

**Training Hyperparameters.** All candidate elastic stages are trained in a parallel way. Specifically, each elastic stage is trained for 6 epochs on 4 V100 GPUs. The first 5 epochs are full-precision training. We use 0.005 as the initial learning rate for Stage 1 and Stage 6, and 0.01 for all the other Stages. We apply a cosine learning rate schedule [3], a batch size of 256, the Adam [2] optimizer. After the full-precision training finishes, we conduct 1 epoch INT8 quantization-aware training with LSQ+. We use a much smaller learning rate of 0.0025 for quantization.

## 3. Device and Latency Prediction

| Name       | Framework         | Processor                         | Measured Hz | Precision |
|------------|-------------------|-----------------------------------|-------------|-----------|
| Intel VNNI | Onnxruntime v1.10 | Intel (R) Xeon(R) Silver 4210 CPU | 2GHz        | FP32/INT8 |
| Pixel 4    | TFLite v2.7       | CortexA76 CPU                     | 2.42GHz     | FP32/INT8 |

Table 3. Our measured edge devices.

**Device details and latency measurement.** Table 3 lists out the detailed inference engine and hardware for our two measured devices. We select Intel VNNI and Pixel 4 CPU because they support both FP32 and INT8 inference. Specifically, we select TFLite and onnxruntime as the inference

| Device     | RMSE  | $\pm 5\%$ accuracy | $\pm 10\%$ accuracy |
|------------|-------|--------------------|---------------------|
| Intel VNNI | 1.5ms | 79.8%              | 92.5%               |
| Pixel4     | 1.3ms | 89.6%              | 100%                |

Table 4. INT8 quantized latency prediction performance of nn-Meter. We report the  $\pm 5\%$  and  $\pm 10\%$  accuracy, that are the percentage of models with predicted latency within the corresponding error bound relative to the measured latency

| Kernel size | Intel VNNI  |             | Pixel4      |             |
|-------------|-------------|-------------|-------------|-------------|
|             | Conv        | DWConv      | Conv        | DWConv      |
| 1           | $3.5\times$ | $2.7\times$ | $2.6\times$ | $0.9\times$ |
| 3           | $3.6\times$ | $1.4\times$ | $4.0\times$ | $2.8\times$ |
| 5           | $3.8\times$ | $1.1\times$ | $3.9\times$ | $1.1\times$ |
| 7           | $4.0\times$ | $0.8\times$ | $3.8\times$ | $1.1\times$ |

Table 5. INT8 quantization speedup on two devices. Kernel size impacts the speedup for DWConv. Configuration:  $H=W=56$ ,  $C_{in}=C_{out}=96$ .

engines for Pixel 4 mobile CPU and Intel CPU, respectively, because they are well-known high-performance engines for edge AI inference. For latency measurement, we follow the practices in [6, 4, 5]. We always measure the inference latency of a given model (either FP32 or INT8 quantized model) on a single CPU core with fixed frequency. The inference batch size is 1. The reported latency in the paper is the arithmetic mean of 50 runs after 10 warmup runs. The 95% confidence interval is within 2%.

**Latency prediction of quantized models.** We now illustrate the details of building quantized latency predictors. Following the original nn-Meter paper, the latency of a given model is the sum of all kernels’ predicted latency. Then the procedure contains two main steps: (i) detect kernels in a model, and (ii) build latency predictors for these kernels. For step (i), we perform the fusion rule detection in nn-Meter and detects 17 kernels (e.g., Conv-bn-relu and DWConv-bn-relu6). For step (ii), we run the adaptive data sampler to collect training data for each kernel and train a randomforest regressor as the kernel-level latency predictor. Each training data sample is a pair of (configurations of a kernel, the inference latency). Taking Conv-bn-relu kernel as an example, we sample different kernel sizes, strides, input/output channel numbers and input resolution for Conv-bn-relu kernel, then we measure their INT8 quantized latency on the target device.

The kernel-level latency predictors training and construction are conduct offline. During the evolutionary search, we use them to predict the INT8 quantized latency for arbitrary model. Table 4 lists out the prediction performance. Specifically, we randomly sample 2k models and predict their INT8 quantized latency for evaluation. Remarkably, nn-Meter achieves 92.5% and 100% prediction accuracy on the Intel VNNI and Pixel 4, respectively.

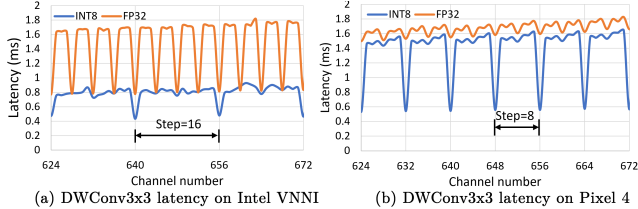

Figure 1. The choice of channel number greatly impact the INT8 latency of DWConv. INT8 latency of DWConv shows a step pattern. Configuration:  $HW=28$ . We set a large DWConv channel number for measurement because expansion ratios are usually larger than 3.

#### 4. Additional Quantization Efficiency Analysis

In Section 2, we studied how the operator type and channel widths in a quantized model impact final inference efficiency. Next, we will illustrate the impact of other configuration dimensions.

**Kernel size.** Table 5 shows the latency speedup of Conv and DWConv with different kernel sizes. Results suggest that the choice of kernel size can result in different speedups after INT8 quantization. Specifically, we notice that kernel size is more crucial to DWConv quantization efficiency than Conv. Unlike Conv can consistently achieve speedups under various kernel sizes, improper kernel size of DWConv can lead to a significant slowdown. Moreover, the most efficient kernel size for DWConv is highly relying on the target devices. DWConv with smaller kernel sizes can achieve larger speedup on Intel VNNI, while DWConv with  $K = 3$  achieves the maximum speedup of  $2.8\times$  on Pixel 4.

Consequently, the INT8 quantized models should consider the choices of kernel sizes to achieve both high accuracy and low inference latency. Instead of searching the optimal kernel sizes for a search space, we directly allow all stages to choose from  $\{3, 5, 7\}$ . In our work, we perform latency-aware evolutionary search to derive the optimal quantized models from the resulting search space. As shown in Table 9 and Table 10, the optimal quantization-friendly kernel sizes are chosen for our discovered model family SEQnet. For example, kernel size of  $3\times 3$  is the dominate choice in DWConv in SEQnet.

**Channel number of DWConv.** Fig. 1 show the latency of DWConv  $3\times 3$  with different channel number on two devices. Surprisingly, we observe a step pattern: the latency of DWConv  $3\times 3$  achieves minimal at special channel numbers. Specifically, in terms of INT8 quantized latency, when  $C$  is divisible to 8 on Pixel 4 (16 on Intel VNNI), the latency achieves a minimal and can be accelerated by  $2.9\times$  ( $1.7\times$  on Intel VNNI). Therefore, we constrain the channel widths in our search space to be divisible by 8 on Pixel 4 and 16 on Intel VNNI. Moreover, we notice that the latency patterns of FP32 and INT8 inference are different on two devices, which further motivates SpaceEvo.

## 5. Search Space Design Details

| Stage             | Depths                  | Kernel Size | Stride | Channel Widths<br>16-divisible | ck |
|-------------------|-------------------------|-------------|--------|--------------------------------|----|
| Conv (STEM)       | 1                       | 3           | 2      | 16 - 32                        | -  |
| Residual (STEM)   | 1-2                     | 3           | 1      | 16 - 32                        | -  |
| Stage1            | 2-4                     | 3, 5, 7     | 2      | 32 - 64                        | 2  |
| Stage2            | 2-4                     | 3, 5, 7     | 2      | 32 - 96                        | 2  |
| Stage3            | 2-6                     | 3, 5, 7     | 2      | 64 - 144                       | 3  |
| Stage4            | 2-6                     | 3, 5, 7     | 1      | 112 - 192                      | 3  |
| Stage5            | 2-6                     | 3, 5, 7     | 2      | 192 - 304                      | 5  |
| Stage6            | 1-2                     | 3, 5, 7     | 1      | 304 - 448                      | 7  |
| Classifier (head) | -                       | -           | -      | -                              | -  |
| input resolution  | 160, 176, 192, 208, 224 |             |        |                                |    |

Table 6. VNNI hyperspace. We search the optimal block type and channel widths for Stage1-6.

| Stage             | Depths                  | Kernel Size | Stride | Channel Widths<br>8-divisible | ck |
|-------------------|-------------------------|-------------|--------|-------------------------------|----|
| Conv (STEM)       | 1                       | 3           | 2      | 16-32                         | -  |
| MBv2 (STEM)       | 1-2                     | 3           | 1      | 16-32                         | -  |
| Stage1            | 2-4                     | 3, 5, 7     | 2      | 24 - 32                       | 2  |
| Stage2            | 2-6                     | 3, 5, 7     | 2      | 40 - 56                       | 2  |
| Stage3            | 2-6                     | 3, 5, 7     | 2      | 80 - 104                      | 3  |
| Stage4            | 2-8                     | 3, 5, 7     | 1      | 96 - 128                      | 3  |
| Stage5            | 2-8                     | 3, 5, 7     | 2      | 192 - 256                     | 5  |
| Stage6            | 1-2                     | 3, 5, 7     | 1      | 320 - 416                     | 7  |
| Classifier (head) | -                       | -           | -      | -                             | -  |
| input resolution  | 160, 176, 192, 208, 224 |             |        |                               |    |

Table 7. Pixel4 hyperspace. We search the optimal block type and channel widths for Stage1-6.

**Hyperspace.** Table 6 and Table 7 summarize the hyperspace structures when targeting Intel VNNI CPU and Pixel 4 mobile CPU, respectively. As introduced in Section 3, we search the 6 stages (Stage1-Stage6) for a quantization-friendly search space. For each elastic stage, it can search: (i) an optimal block type from a pool as shown in Table 8; and (ii) the optimal channel widths for that block type as shown in Table 6 and Table 7. Other search space dimensions including kernel sizes, expand ratios and input resolutions are unsearchable and using manual settings.

In total, the hyperspace contains  $\sim 10^9$  possible candidate search spaces, which is extremely large and we leverage the aging evolution for efficient search. For better mutations, we encode a candidate search space as the format of *PerStageBlock-PerStageWidth*. As shown in Table 8, we assign an unique search id for each candidate block types. For example, 1 indicates selecting the MBv2 block. For the channel widths, we use the minimal channel index as the encoding. For example, 0 indicates selecting channel widths of  $\{32, 48\}$  (32 is the  $0^{th}$  item in  $\{32, 48, 64\}$ ) for Stage1 on the Intel VNNI; 1 indicates selecting  $\{48, 64\}$ . Taking 111111-000000 as an example, it means that all stages choose the MBv2 block; and the chosen channel widths for Stage1 to Stage6 are  $\{32, 48\}$ ,  $\{32, 48\}$ ,  $\{64, 80, 96\}$ ,  $\{112, 128, 144\}$ ,  $\{192, 208, 224, 240, 256\}$ ,  $\{304, 320, 336, 352, 368, 384, 400\}$ , respectively.

| Block type             | Search id | Intel VNNI    |            | Pixel4        |            |
|------------------------|-----------|---------------|------------|---------------|------------|
|                        |           | Expand Ratios | Activation | Expand Ratios | Activation |
| MBv1                   | 0         | -             | relu       | -             | relu       |
| MBv2                   | 1         | 4, 6, 8       | relu6      | 3, 6, 8       | relu6      |
| MBv3                   | 2         | 4, 6, 8       | hswish     | 3, 6, 8       | swish      |
| Residual bottleneck    | 3         | 0.5, 1.0, 1.5 | relu       | 0.5, 1.0, 1.5 | relu       |
| Residual bottleneck+SE | 4         | 0.5, 1.0, 1.5 | relu       | 0.5, 1.0, 1.5 | relu       |
| FusedMB                | 5         | 1, 2, 3, 4    | swish      | 1, 2, 3, 4    | swish      |
| FusedMB+SE             | 6         | 1, 2, 3, 4    | swish      | 1, 2, 3, 4    | swish      |

Table 8. Block choices for an elastic stage. We set larger expand ratios and use swish as the activation function

## 6. Architecture visualization of SEQnet

We visualize the searched INT8 quantized model architectures in Table 9 and Table 10. ‘d’ denotes number of layers, ‘c’ denotes the number of output channels, ‘k’ denotes kernel size, ‘e’ denotes expansion ratio. If a stage has multiple layers, we list out the kernel size, output channel numbers, expansion ratios for each layer and use ‘-’ to separate them. For example, c: 32-48 indicates that the channel numbers are 32 for the first layer and 48 for the second layer.

## 7. Searched space

Table 11 and Table 12 list out the searched space structures for Intel VNNI and Pixel4 mobile CPU, respectively. In experiment section, the main results (are reported through searching the two search spaces. In addition, we provide the detailed search space structures under other latency constraints in Table 13, Table 14 and Table 15.

## References

- [1] Ekin D. Cubuk, Barret Zoph, Dandelion Mane, Vijay Vasudevan, and Quoc V. Le. Autoaugment: Learning augmentation strategies from data. In *Proceedings of the IEEE/CVF Conference on Computer Vision and Pattern Recognition (CVPR)*, June 2019. 1
- [2] Diederik P. Kingma and Jimmy Ba. Adam: A method for stochastic optimization. In Yoshua Bengio and Yann LeCun, editors, *3rd International Conference on Learning Representations, ICLR 2015, San Diego, CA, USA, May 7-9, 2015, Conference Track Proceedings*, 2015. 2
- [3] Ilya Loshchilov and Frank Hutter. SGDR: Stochastic gradient descent with warm restarts. In *International Conference on Learning Representations*, 2017. 2
- [4] Xiaohu Tang, Shihao Han, Li Lyna Zhang, Ting Cao, and Yunxin Liu. To bridge neural network design and real-world performance: A behaviour study for neural networks. In A. Smola, A. Dimakis, and I. Stoica, editors, *Proceedings of Machine Learning and Systems*, volume 3, pages 21–37, 2021. 2
- [5] Xudong Wang, Li Lyna Zhang, Yang Wang, and Mao Yang. Towards efficient vision transformer inference: A first study of transformers on mobile devices. In *Proceedings of the 23rd Annual International Workshop on Mobile Computing Systems and Applications, HotMobile ’22*, page 1–7. Association for Computing Machinery, 2022. 2
- [6] Li Lyna Zhang, Shihao Han, Jianyu Wei, Ningxin Zheng, Ting Cao, Yuqing Yang, and Yunxin Liu. nn-meter: Towards accurate latency prediction of deep-learning model inference on diverse edge devices. In *Proceedings of the 19th Annual International Conference on Mobile Systems, Applications, and Services*, page 81–93, New York, NY, USA, 2021. ACM. 2

|                     | SEQnet@vnni-A0                         | SEQnet@vnni-A1                                 | SEQnet@vnni-A2                                         | SEQnet@vnni-A3                                         | SEQnet@vnni-A4                                                 |
|---------------------|----------------------------------------|------------------------------------------------|--------------------------------------------------------|--------------------------------------------------------|----------------------------------------------------------------|
| Conv                | d: 1<br>c: 16<br>k: 3                  | d: 1<br>c: 16<br>k: 3                          | d: 1<br>c: 16<br>k: 3                                  | d: 1<br>c: 16<br>k: 3                                  | d: 1<br>c: 32<br>k: 3                                          |
| Residual bottleneck | d: 1<br>c: 16<br>k: 3<br>e: 0.5        | d: 1<br>c: 16<br>k: 3<br>e: 0.5                | d: 1<br>c: 16<br>k: 3<br>e: 0.5                        | d: 1<br>c: 32<br>k: 3<br>e: 0.5                        | d: 1<br>c: 32<br>k: 3<br>e: 0.5                                |
| MBv2                | d: 2<br>c: 32-32<br>k: 3-3<br>e: 4-4   | d: 2<br>c: 32-32<br>k: 3-3<br>e: 4-4           | d: 2<br>c: 32-32<br>k: 3-3<br>e: 4-6                   | d: 2<br>c: 32-48<br>k: 3-3<br>e: 4-8                   | d: 3<br>k: 3-3-3<br>c: 48-48-32<br>e: 4-6-6                    |
| FusedMB             | d: 2<br>c: 64-64<br>k: 3-3<br>e: 1-1   | d: 2<br>c: 64-80<br>k: 3-3<br>e: 2-1           | d: 2<br>c: 64-64<br>k: 3-3<br>e: 3-2                   | d: 2<br>c: 80-80<br>k: 3-3<br>e: 4-2                   | d: 3<br>c: 64-64-64<br>k: 5-3-3<br>e: 4-3-1                    |
| MBv2                | d: 2<br>c: 112-112<br>k: 3-3<br>e: 4-4 | d: 3<br>c: 128-112-112<br>k: 3-5-3<br>e: 4-6-4 | d: 4<br>c: 112-112-128<br>k: 3-3-5-5<br>e: 4-4-6-8     | d: 3<br>c: 144-128-112<br>k: 5-5-5<br>e: 6-6-6         | d: 4<br>c: 112-112-112-112<br>k: 5-5-3-3-5<br>e: 8-8-4-4       |
| MBv2                | d: 2<br>c: 144-144<br>k: 3-3<br>e: 4-4 | d: 2<br>c: 144-176<br>k: 3-3<br>e: 4-4         | d: 4<br>c: 144-144-160-160<br>k: 3-5-5-3<br>e: 8-4-4-4 | d: 4<br>c: 144-176-144-144<br>k: 3-3-5-3<br>e: 6-8-4-4 | d: 5<br>c: 176-176-144-144-160<br>k: 5-5-3-3-3<br>e: 8-4-4-6-4 |
| MBv3 (hswish)       | d: 2<br>c: 240-240<br>k: 3-3<br>e: 4-4 | d: 3<br>c: 304-304-256<br>k: 3-3-3<br>e: 4-6-4 | d: 4<br>c: 288-272-288-256<br>k: 3-3-3-3<br>e: 4-6-6-4 | d: 4<br>c: 272-288-272-240<br>k: 3-5-3-3<br>e: 8-6-4-6 | d: 4<br>c: 304-272-272-288<br>k: 3-3-5-3<br>e: 8-8-6-4         |
| MBv3 (hswish)       | d: 1<br>c: 320<br>k: 3<br>e: 4         | d: 1<br>c: 368<br>k: 5<br>e: 4                 | d: 1<br>c: 320<br>k: 5<br>e: 4                         | d: 1<br>c: 320<br>k: 3<br>e: 6                         | d: 2<br>c: 352-320<br>k: 3-3<br>e: 6-4                         |
| Resolution          | 160                                    | 192                                            | 208                                                    | 224                                                    | 224                                                            |

Table 9. INT8 quantized models produced by SpaceEvo@VNNI.

|            | SEQnet@pixel4-A0                       | SEQnet@pixel4-A1                                       | SEQnet@pixel4-A2                                       | SEQnet@pixel4-A3                                       | SEQnet@pixel4-A4                                               |
|------------|----------------------------------------|--------------------------------------------------------|--------------------------------------------------------|--------------------------------------------------------|----------------------------------------------------------------|
| Conv       | d: 1<br>c: 16<br>k: 3                  | d: 1<br>c: 16<br>k: 3                                  | d: 1<br>c: 16<br>k: 3                                  | d: 1<br>c: 16<br>k: 3                                  | d: 1<br>c: 24<br>k: 3                                          |
| MBv2       | d: 1<br>c: 16<br>k: 3<br>e: 1          | d: 1<br>c: 16<br>k: 3<br>e: 1                          | d: 1<br>c: 16<br>k: 3<br>e: 1                          | d: 1<br>c: 16<br>k: 3<br>e: 1                          | d: 2<br>c: 16-24<br>k: 3-3<br>e: 1-1                           |
| MBv2       | d: 2<br>c: 32-32<br>k: 3-3<br>e: 3-3   | d: 2<br>c: 32-32<br>k: 3-3<br>e: 3-3                   | d: 2<br>c: 40-32<br>k: 3-3<br>e: 3-3                   | d: 2<br>c: 32-32<br>k: 3-3<br>e: 8-3                   | d: 2<br>k: 3-3<br>c: 32-32<br>e: 6-8                           |
| MBv3       | d: 2<br>c: 64-64<br>k: 3-3<br>e: 3-3   | d: 2<br>c: 64-64<br>k: 3-3<br>e: 3-3                   | d: 2<br>c: 64-72<br>k: 3-3<br>e: 3-3                   | d: 3<br>c: 64-72<br>k: 3-3-5<br>e: 3-6-3               | d: 3<br>c: 72-64-64<br>k: 3-3-5<br>e: 6-3-3                    |
| MBv3       | d: 2<br>c: 96-96<br>k: 3-3<br>e: 3-3   | d: 2<br>c: 96-96<br>k: 7-3<br>e: 3-3                   | d: 2<br>c: 96-96<br>k: 3-3<br>e: 3-6                   | d: 3<br>c: 64-112-96<br>k: 7-3-3<br>e: 8-3-6           | d: 4<br>c: 112-96-104-104<br>k: 3-5-5-3<br>e: 6-6-3-3          |
| MBv3       | d: 2<br>c: 144-144<br>k: 3-3<br>e: 3-3 | d: 2<br>c: 144-144<br>k: 3-3<br>e: 3-3                 | d: 3<br>c: 152-160-152<br>k: 5-3-3<br>e: 3-6-3         | d: 4<br>c: 104-152-144-152<br>k: 3-3-3-5<br>e: 6-6-3-3 | d: 4<br>c: 152-144-144-152<br>k: 3-3-3-5<br>e: 8-8-6-3         |
| MBv3       | d: 2<br>c: 192-192<br>k: 3-3<br>e: 3-3 | d: 4<br>c: 224-192-208-192<br>k: 3-3-5-3<br>e: 6-6-6-3 | d: 4<br>c: 200-224-200-200<br>k: 7-5-7-5<br>e: 6-3-3-6 | d: 4<br>c: 200-192-208-192<br>k: 3-3-3-5<br>e: 6-8-6-6 | d: 5<br>c: 224-216-208-224-208<br>k: 7-5-3-5-3<br>e: 8-6-6-3-3 |
| MBv3       | d: 1<br>c: 216<br>k: 3<br>e: 3         | d: 1<br>c: 232<br>k: 3<br>e: 3                         | d: 1<br>c: 248<br>k: 5<br>e: 3                         | d: 1<br>c: 280<br>k: 3<br>e: 6                         | d: 1<br>c: 296<br>k: 3<br>e: 6                                 |
| Resolution | 160                                    | 208                                                    | 224                                                    | 224                                                    | 224                                                            |

Table 10. INT8 quantized models produced by SpaceEvo@Pixel4

Table 11. SpaceEvo@VNNI: searched space under constraint of {8, 10, 15, 20, 25}ms on VNNI.

| Stage               | Depths                  | Kernel Size | Stride | Channel Widths<br>16-divisible | Expand Ratio |
|---------------------|-------------------------|-------------|--------|--------------------------------|--------------|
| Conv                | 1                       | 3           | 2      | 16 - 32                        | -            |
| Residual bottleneck | 1-2                     | 3           | 1      | 16 - 32                        | 0.5          |
| MBv2                | 2-4                     | 3, 5, 7     | 2      | 32 - 48                        | 4, 6, 8      |
| FusedMB             | 2-4                     | 3, 5, 7     | 2      | 64 - 80                        | 1, 2, 3, 4   |
| MBv2                | 2-6                     | 3, 5, 7     | 2      | 112 - 144                      | 4, 6, 8      |
| MBv2                | 2-6                     | 3, 5, 7     | 1      | 144 - 176                      | 4, 6, 8      |
| MBv3 (hswish)       | 2-6                     | 3, 5, 7     | 2      | 240 - 304                      | 4, 6, 8      |
| MBv3 (hswish)       | 1-2                     | 3, 5, 7     | 1      | 320 - 416                      | 4, 6, 8      |
| Classifier          | -                       | -           | -      | -                              | -            |
| input resolution    | 160, 176, 192, 208, 224 |             |        |                                |              |

Table 12. SpaceEvo@Pixel4: searched space under constraint of {15, 20, 25, 30, 35}ms on Pixel4.

| Stage            | Depths                  | Kernel Size | Stride | Channel Widths<br>8-divisible | Expand Ratio |
|------------------|-------------------------|-------------|--------|-------------------------------|--------------|
| Conv             | 1                       | 3           | 2      | 16-32                         | -            |
| MBv2             | 1-2                     | 3           | 1      | 16-32                         | 1            |
| MBv2             | 2-4                     | 3, 5, 7     | 2      | 32 - 40                       | 3, 6, 8      |
| MBv3             | 2-6                     | 3, 5, 7     | 2      | 64 - 72                       | 3, 6, 8      |
| MBv3             | 2-6                     | 3, 5, 7     | 2      | 96 - 112                      | 3, 6, 8      |
| MBv3             | 2-8                     | 3, 5, 7     | 1      | 144 - 160                     | 3, 6, 8      |
| MBv3             | 2-8                     | 3, 5, 7     | 2      | 192 - 224                     | 3, 6, 8      |
| MBv3             | 1-2                     | 3, 5, 7     | 1      | 216 - 312                     | 3, 6, 8      |
| Classifier       | -                       | -           | -      | -                             | -            |
| input resolution | 160, 176, 192, 208, 224 |             |        |                               |              |

Table 13. SpaceEvo@Pixel4-medium: searched space under constraint of {10, 15, 20, 25, 30}ms.

| Stage            | Depths                  | Kernel Size | Stride | Channel Widths<br>8-divisible | Expand Ratio |
|------------------|-------------------------|-------------|--------|-------------------------------|--------------|
| Conv             | 1                       | 3           | 2      | 16 - 32                       | -            |
| MBv2             | 1-2                     | 3           | 1      | 16 - 32                       | 1            |
| MBv2             | 2-4                     | 3, 5, 7     | 2      | 32 - 40                       | 3, 6, 8      |
| MBv2             | 2-4                     | 3, 5, 7     | 2      | 64 - 72                       | 3, 6, 8      |
| MBv3             | 2-6                     | 3, 5, 7     | 2      | 88 - 104                      | 3, 6, 8      |
| MBv3             | 2-6                     | 3, 5, 7     | 1      | 144 - 160                     | 3, 6, 8      |
| MBv3             | 2-6                     | 3, 5, 7     | 2      | 200 - 240                     | 3, 6, 8      |
| MBv1             | 1-2                     | 3, 5, 7     | 1      | 216 - 312                     | 3, 6, 8      |
| Classifier       | -                       | -           | -      | -                             | -            |
| input resolution | 160, 176, 192, 208, 224 |             |        |                               |              |

Table 14. SpaceEvo@Pixel4-tiny: searched space under constraint of {6, 10, 15, 20, 25}ms.

| Stage               | Depths                  | Kernel Size | Stride | Channel Widths<br>8-divisible | Expand Ratio |
|---------------------|-------------------------|-------------|--------|-------------------------------|--------------|
| Conv                | 1                       | 3           | 2      | 16-32                         | -            |
| MBv2                | 1-2                     | 3           | 1      | 16-32                         | 1            |
| Residual bottleneck | 2-4                     | 3, 5, 7     | 2      | 32 - 40                       | 3, 6, 8      |
| Residual bottleneck | 2-6                     | 3, 5, 7     | 2      | 48 - 56                       | 3, 6, 8      |
| MBv3                | 2-6                     | 3, 5, 7     | 2      | 88 - 104                      | 3, 6, 8      |
| MBv2                | 2-8                     | 3, 5, 7     | 1      | 128 - 144                     | 3, 6, 8      |
| MBv2                | 2-8                     | 3, 5, 7     | 2      | 192 - 224                     | 3, 6, 8      |
| MBv1                | 1-2                     | 3, 5, 7     | 1      | 216 - 312                     | 3, 6, 8      |
| Classifier          | -                       | -           | -      | -                             | -            |
| input resolution    | 160, 176, 192, 208, 224 |             |        |                               |              |

Table 15. SpaceEvo@VNNI-large: searched space under constraint of {10, 15, 20, 25, 30}ms.

| Stage               | Depths                  | Kernel Size | Stride | Channel Widths<br>16-divisible | Expand Ratio |
|---------------------|-------------------------|-------------|--------|--------------------------------|--------------|
| Conv                | 1                       | 3           | 2      | 16 - 32                        | -            |
| Residual bottleneck | 1-2                     | 3           | 1      | 16 - 32                        | 0.5          |
| MBv2                | 2-4                     | 3, 5, 7     | 2      | 48 - 64                        | 4, 6, 8      |
| MBv3 (hswish)       | 2-4                     | 3, 5, 7     | 2      | 80 - 96                        | 4, 6, 8      |
| MBv2                | 2-6                     | 3, 5, 7     | 2      | 112 - 144                      | 4, 6, 8      |
| MBv2                | 2-6                     | 3, 5, 7     | 1      | 160 - 192                      | 4, 6, 8      |
| MBv3 (hswish)       | 2-6                     | 3, 5, 7     | 2      | 240 - 304                      | 4, 6, 8      |
| MBv3 (hswish)       | 1-2                     | 3, 5, 7     | 1      | 320 - 416                      | 4, 6, 8      |
| Classifier          | -                       | -           | -      | -                              | -            |
| input resolution    | 160, 176, 192, 208, 224 |             |        |                                |              |
